# Supplementary material for: GREM1 is a potential biomarker for the progression and prognosis of bladder cancer
Source: Springer Nature journal article supplement (doi:10.1186/s12957-023-03128-0), 2023-08-22

Figure 1

anti-GREM1-23kDa

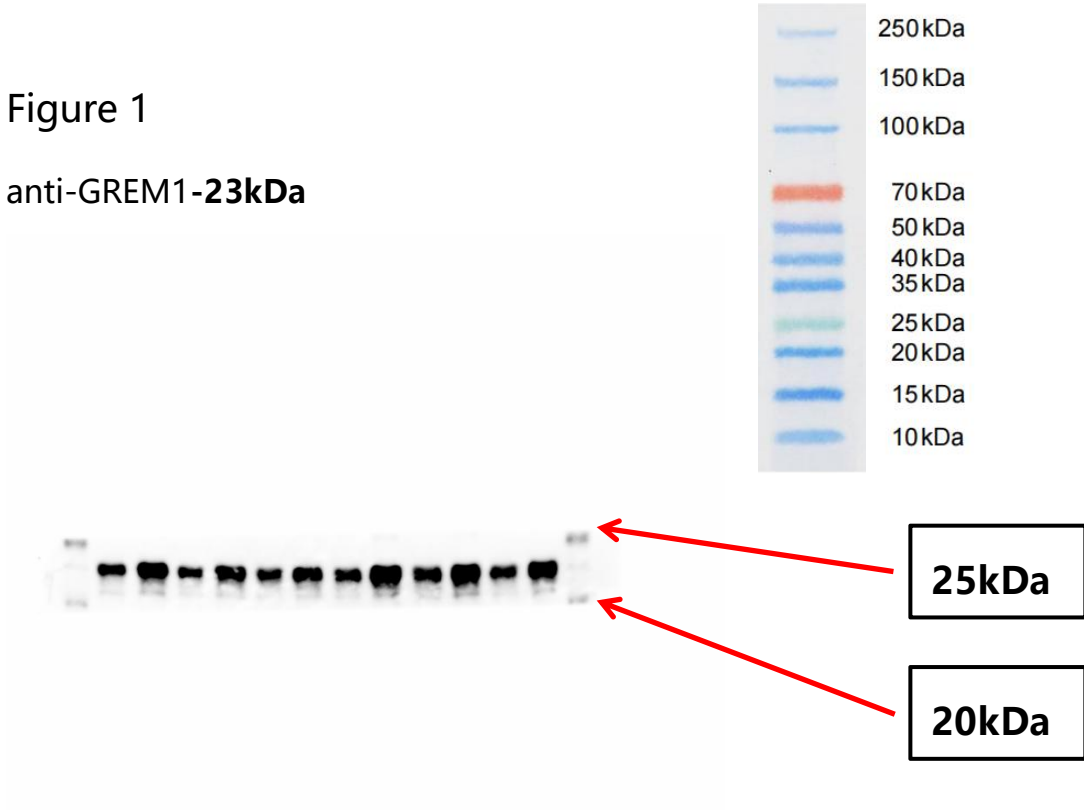

anti-GAPDH-36kDa

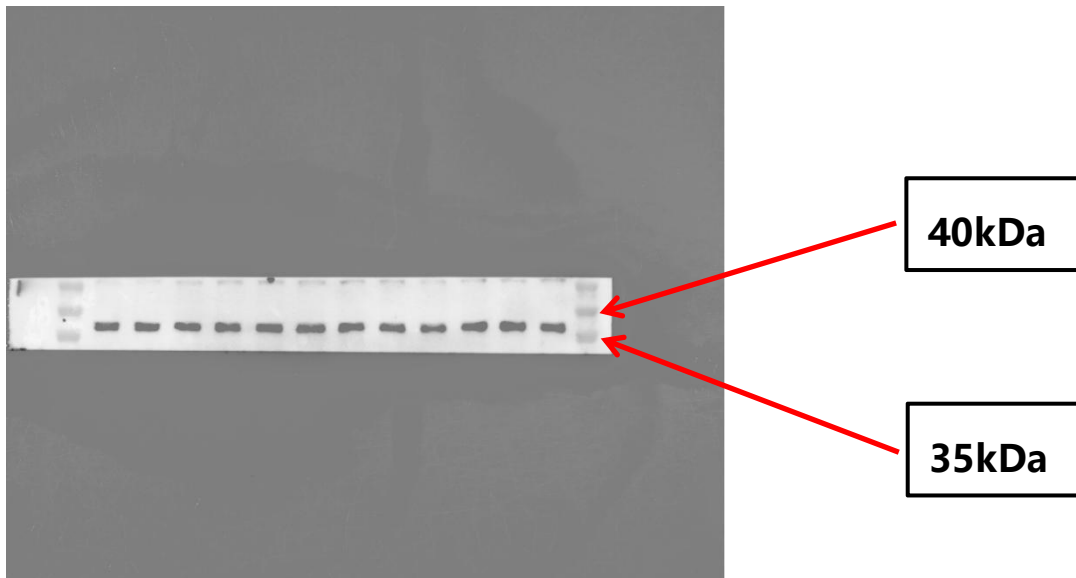

anti-GREM1-23kDa

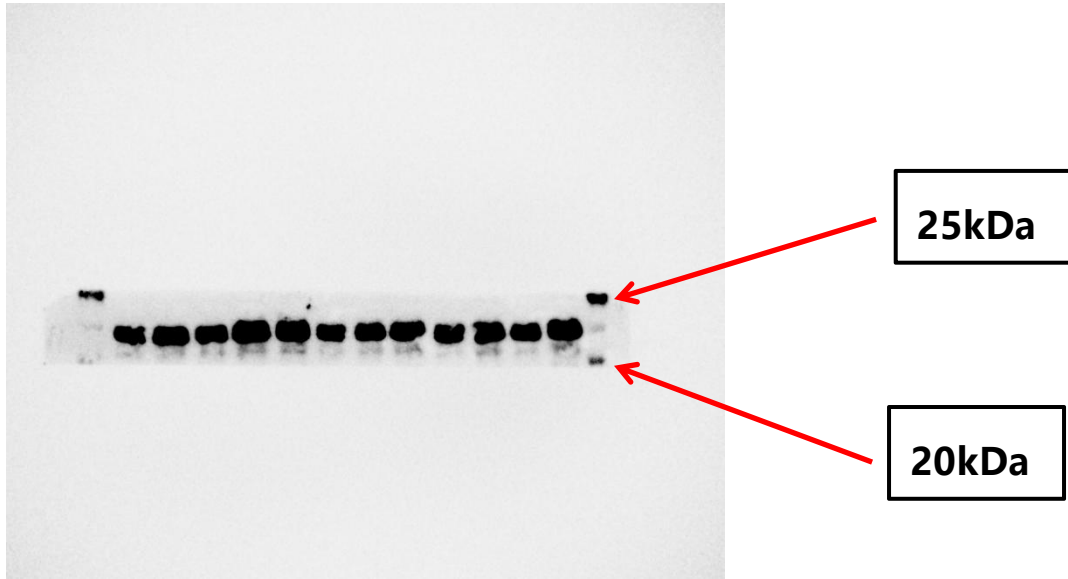

anti-GAPDH-36kDa

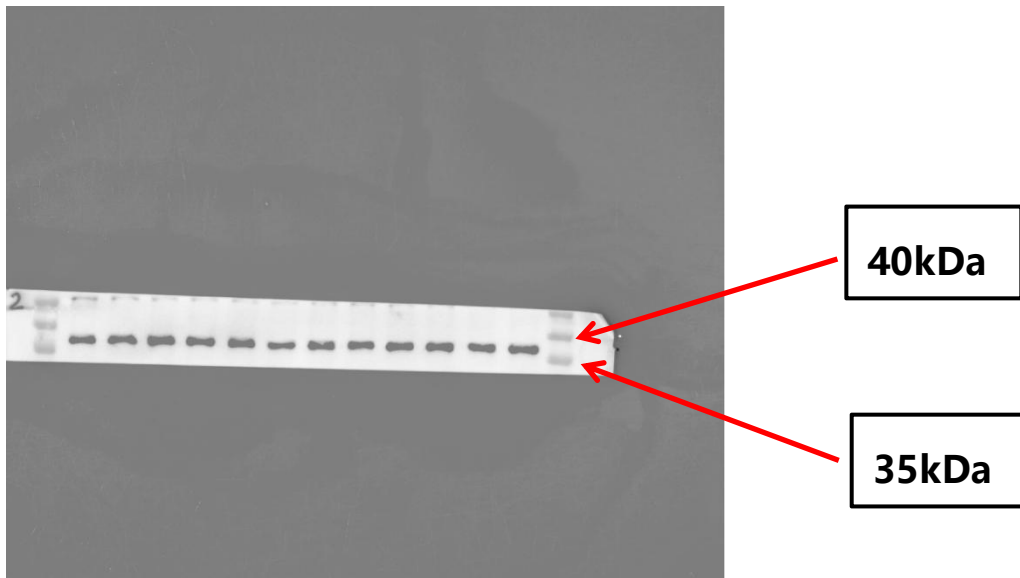

Figure 3

anti-GREM1-23kDa

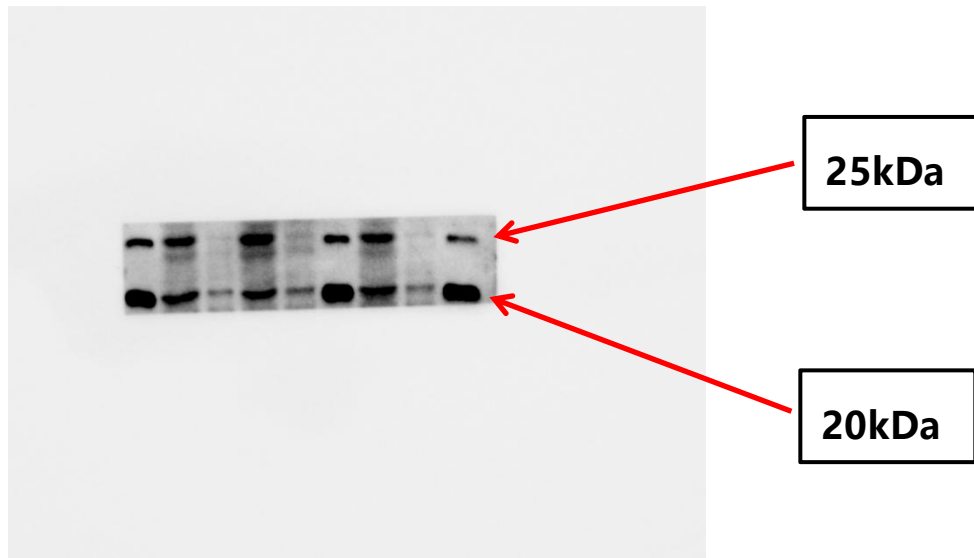

anti-GAPDH-36kDa

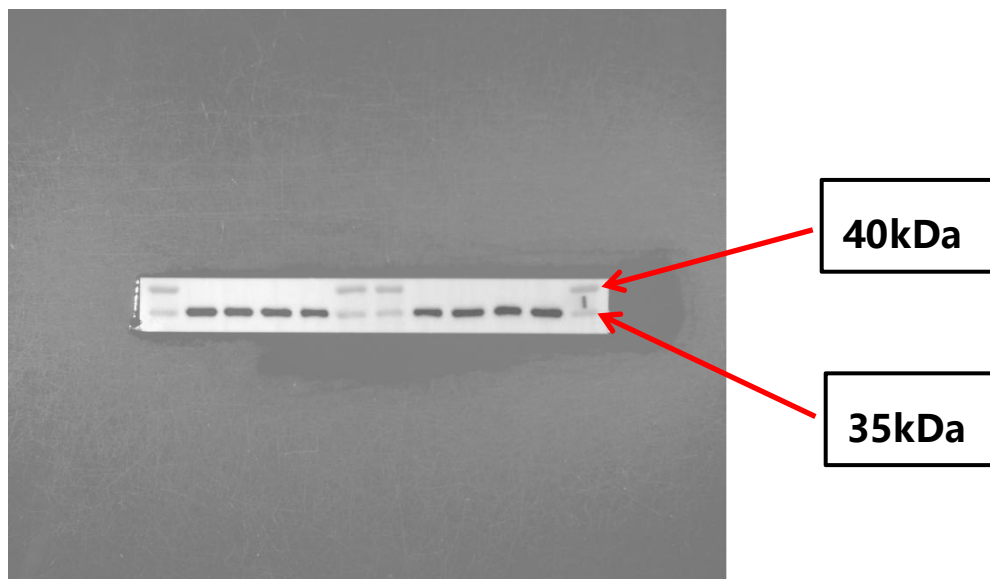

Figure 4

anti-E-Cadherin-135KDa

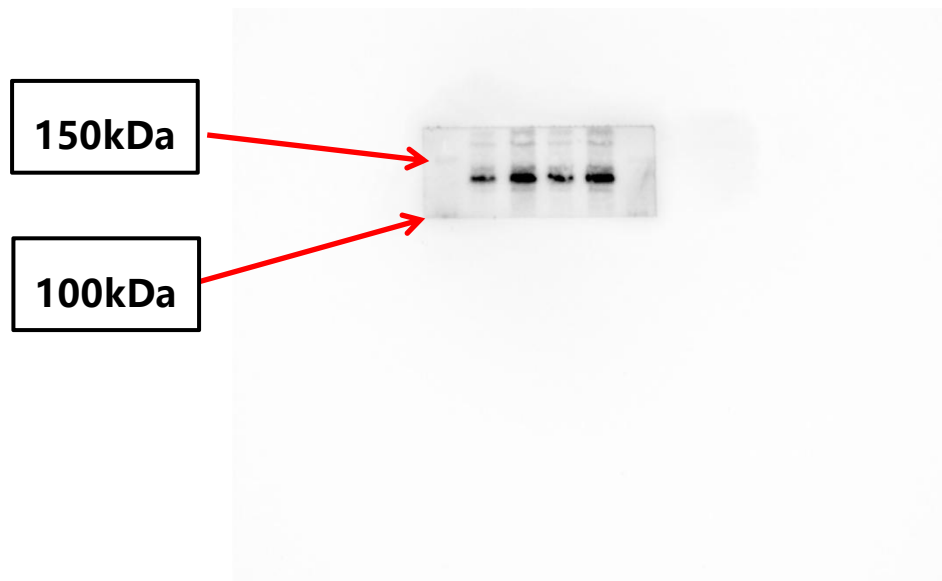

anti-Vimentin-54kDa

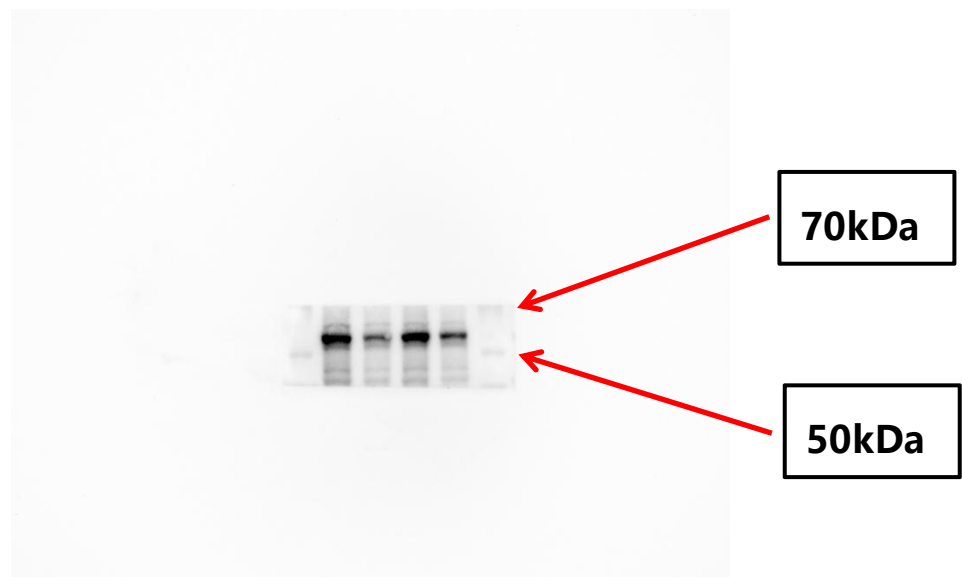

anti-N-Cadherin-135KDa

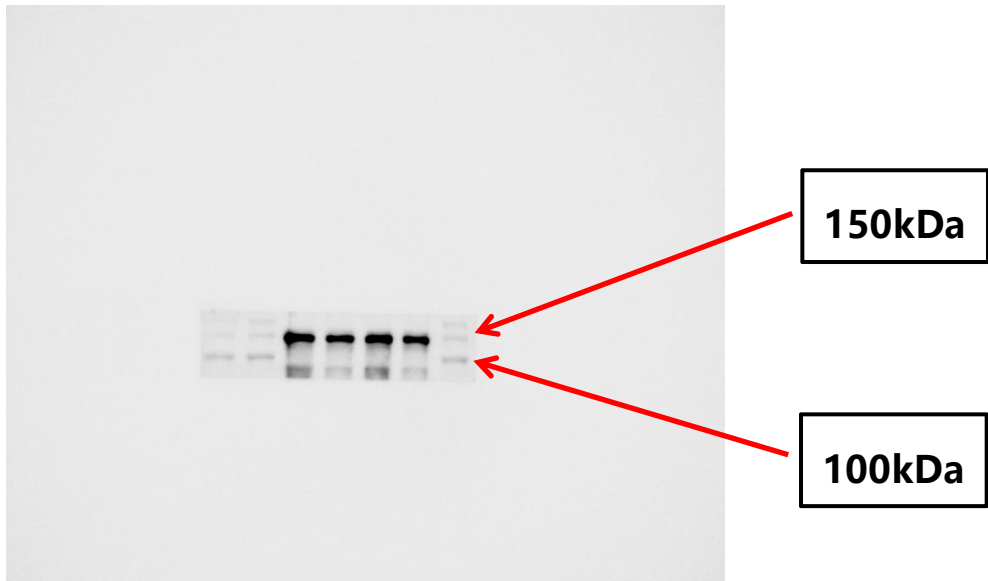

anti-GAPDH-36KDa

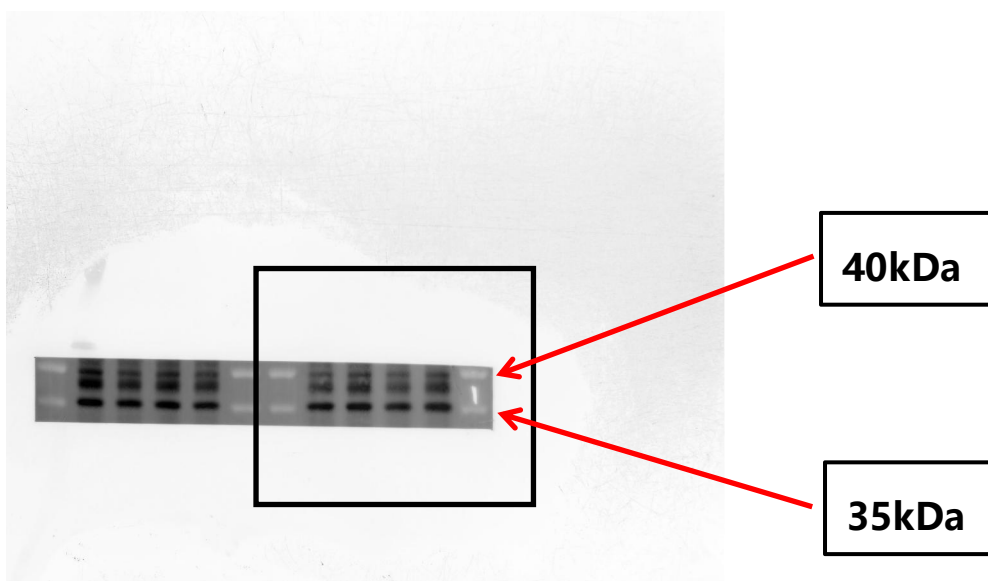

Figure 6

anti-p-PI3K-85KDa

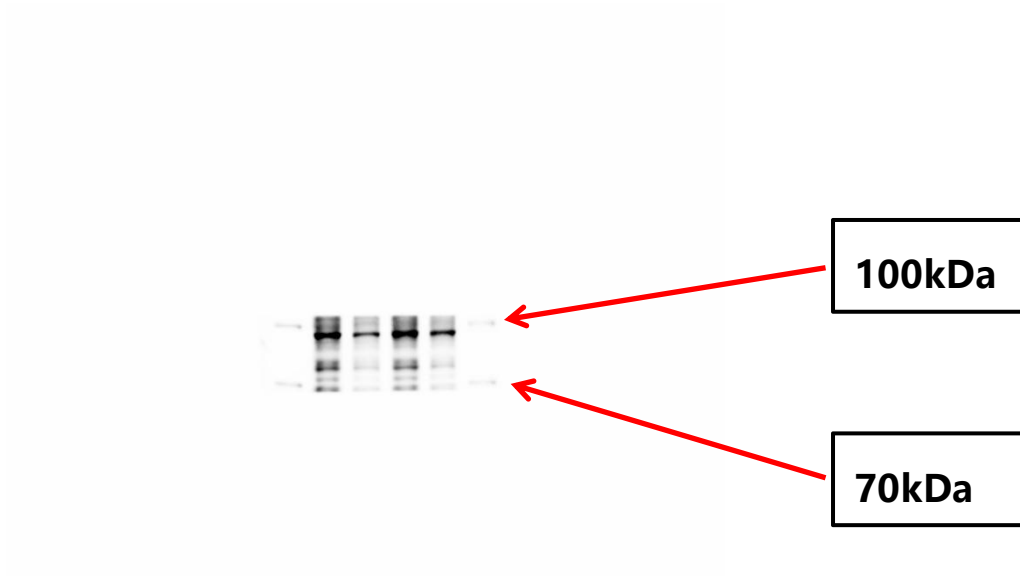

anti-PI3K-85KDa

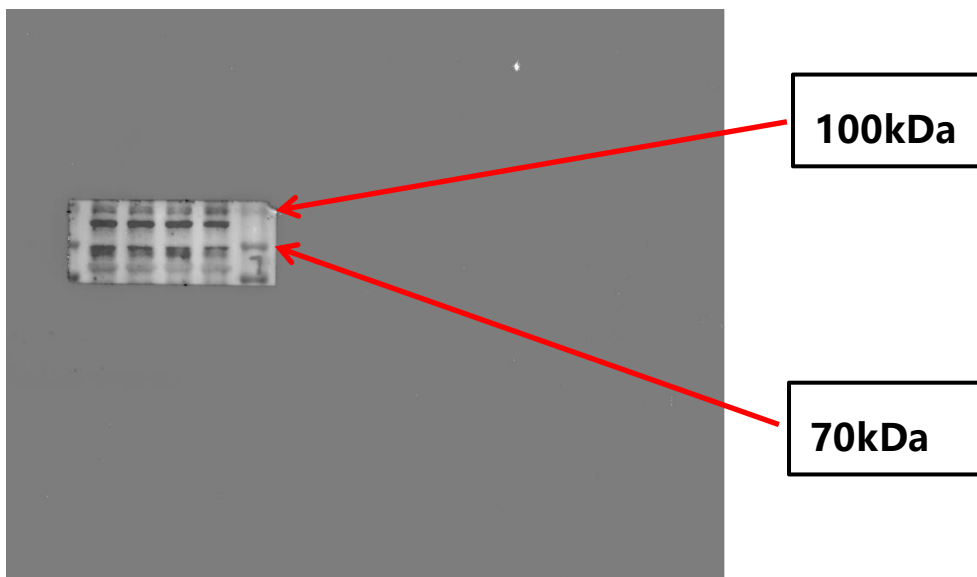

anti-p-AKT-60KDa

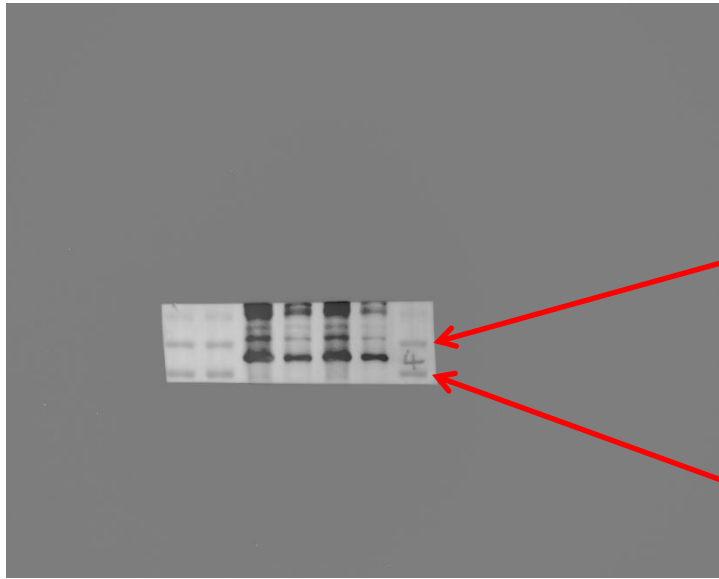

70kDa

50kDa

anti-AKT-60KDa

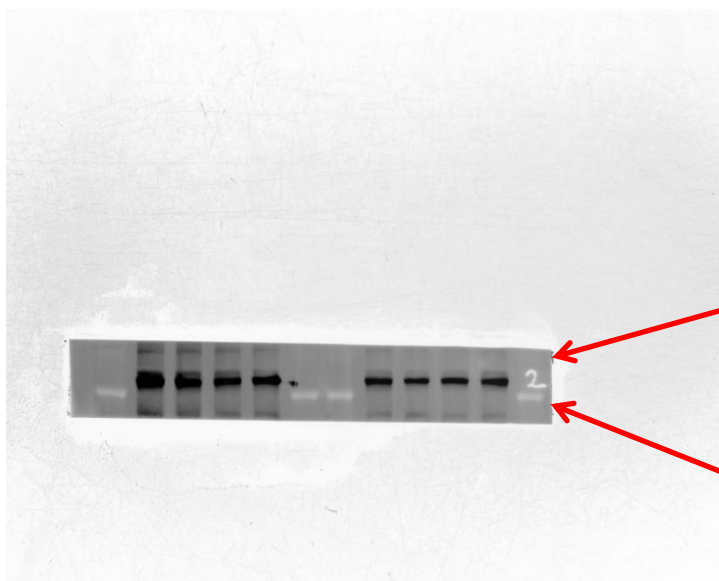

70kDa

50kDa

anti-GAPDH-36KDa

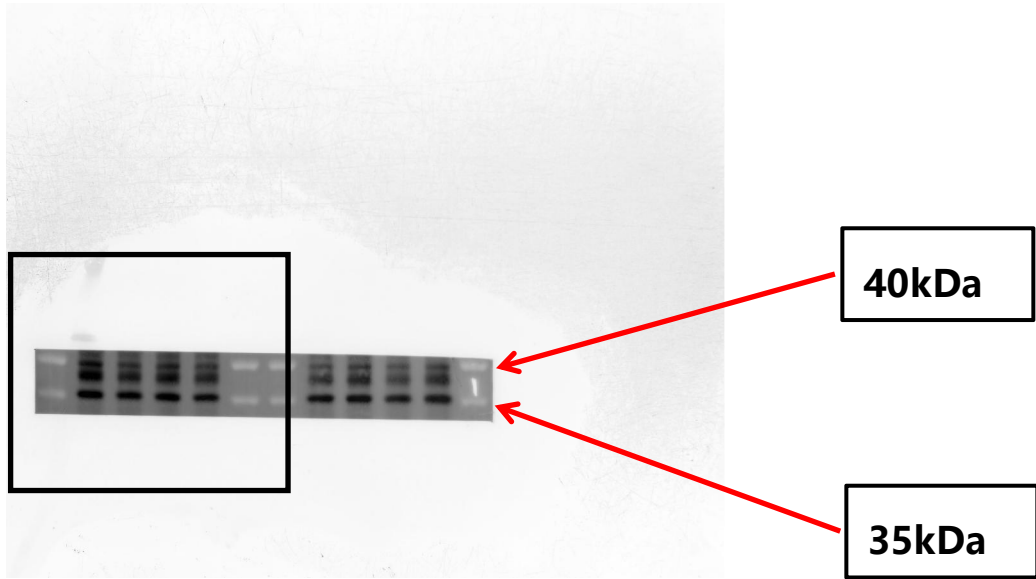

Supplement: MOESM1 [file 25948800]
